# Supplementary material for: Lacticaseibacillus rhamnosus FM9 and Limosilactobacillus fermentum Y57 Are as Effective as Statins at Improving Blood Lipid Profile in High Cholesterol, High-Fat Diet Model in Male Wistar Rats
Source: MDPI journal article supplement (doi:10.3390/nu14081654), 2022-04-15
Supplement: s1 [file s1]

## Supplementary Data

Figure S1 (a–h): GIT related stress of LAB isolates

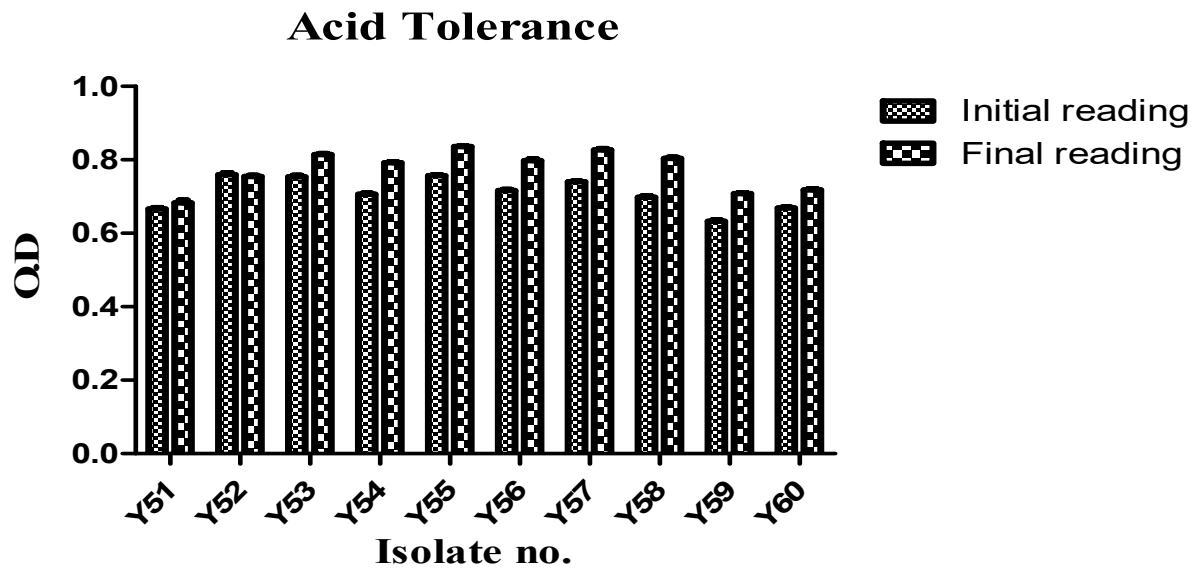

Figure S1(a): comparative analysis of phenol tolerance of isolates

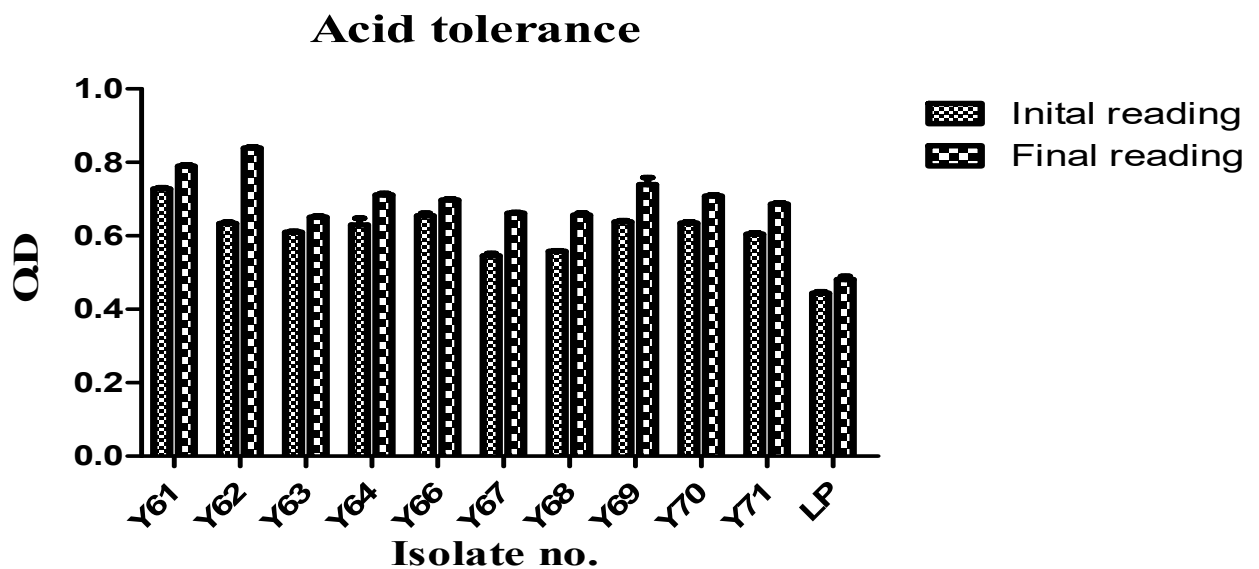

Figure S1(b): comparative analysis of phenol tolerance of isolate

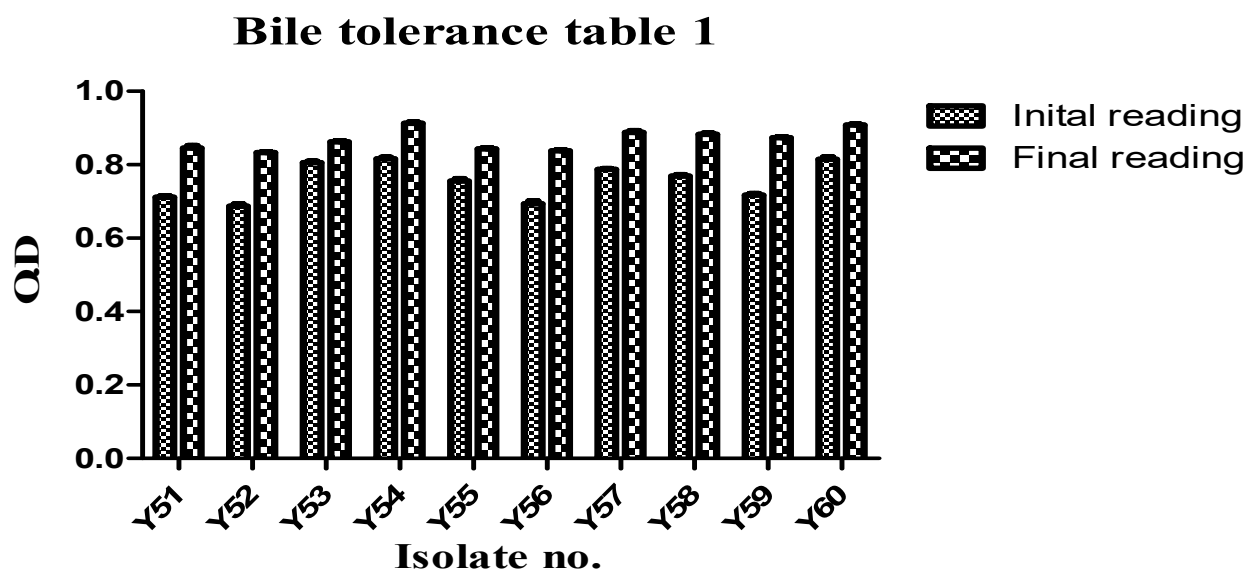

Figure S1(c): comparative analysis of phenol tolerance of isolates

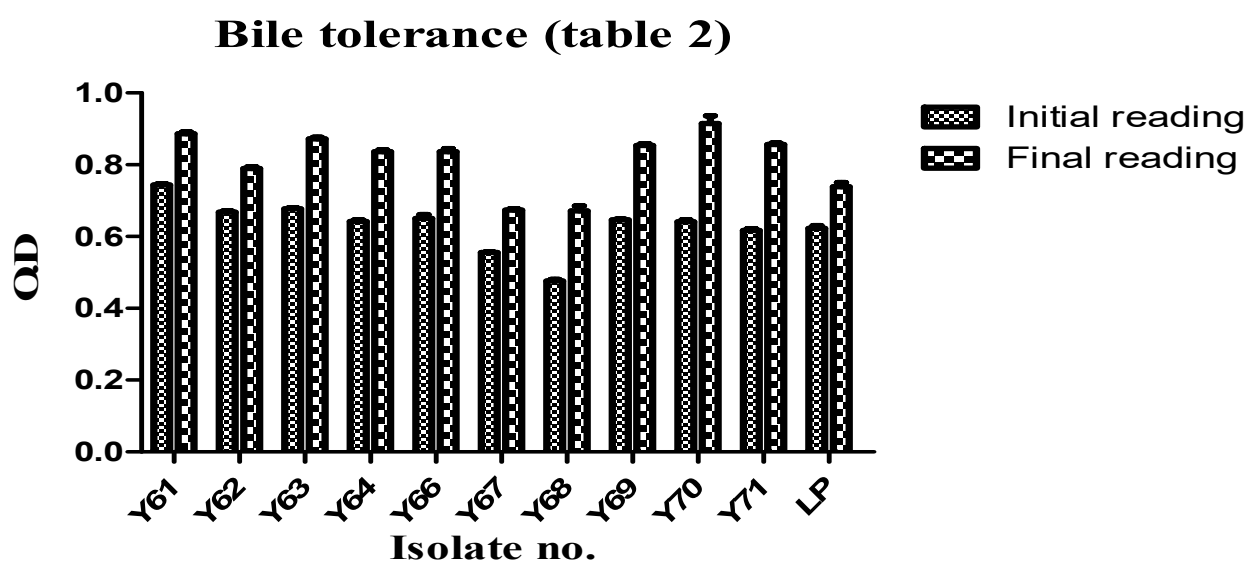

Figure S1(d): comparative analysis of bile tolerance of isolates

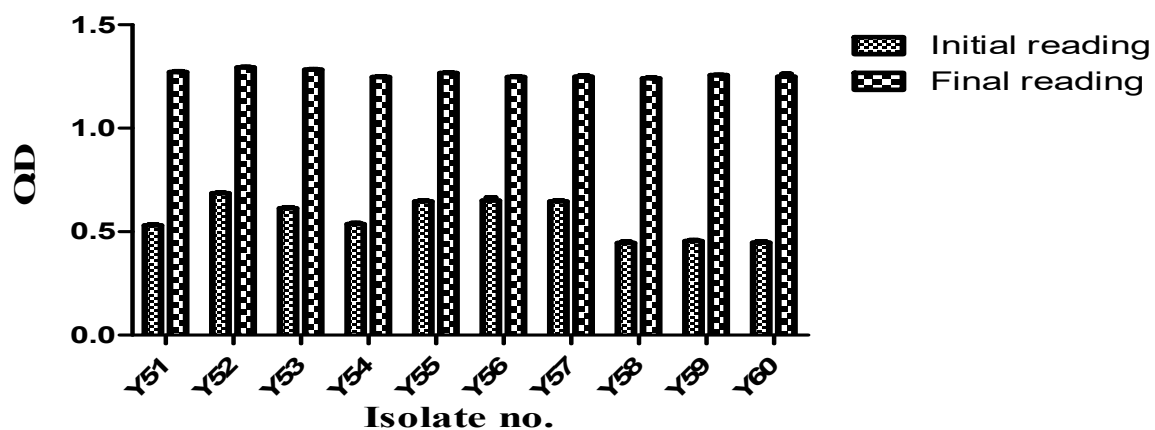

Figure S1(e): comparative analysis of phenol tolerance of isolates

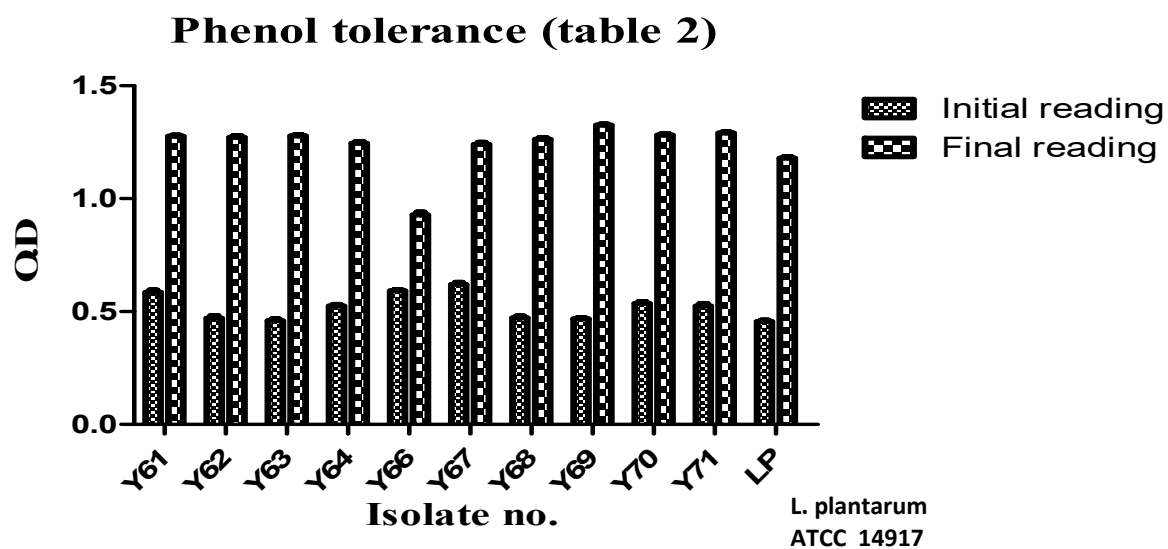

Figure S1(f): comparative analysis of phenol tolerance of isolates

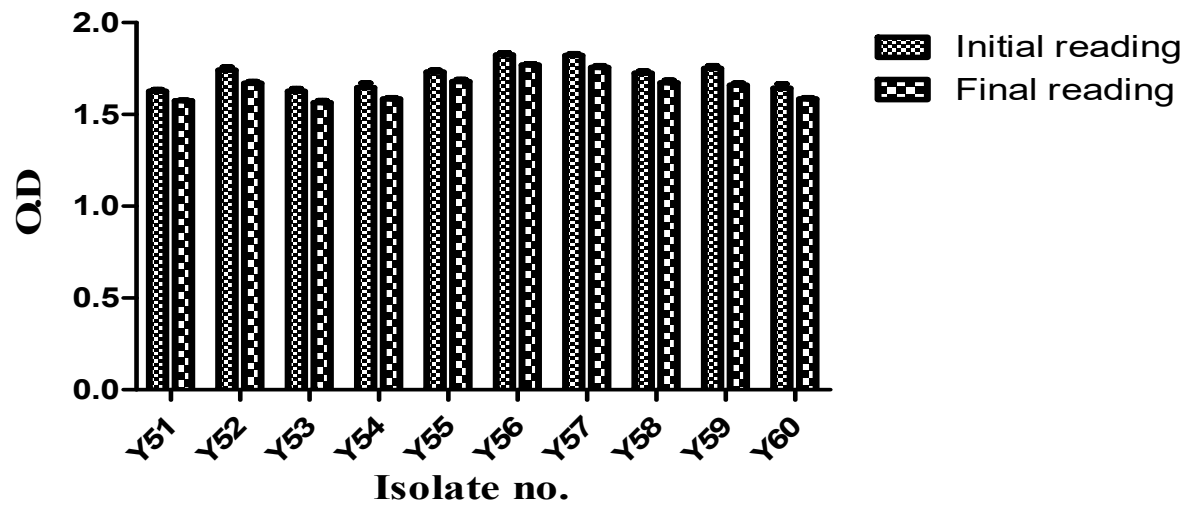

Figure S1(g): comparative analysis of lysozyme tolerance of isolate

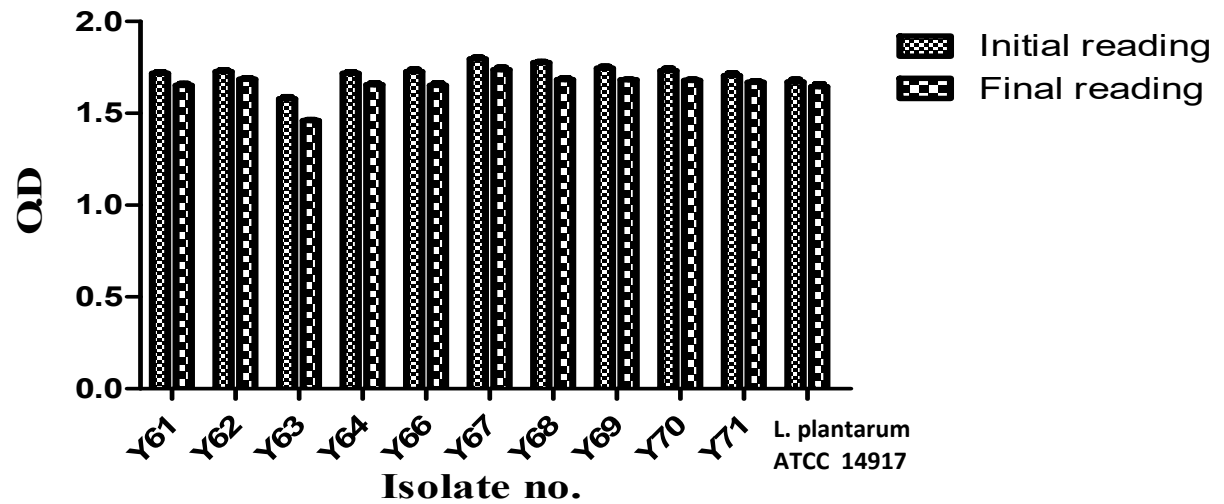

Figure S1(h): comparative analysis of lysozyme tolerance of isolates
